# Supplementary material
Source: PubMed Central journal article supplement (PMC4096429)
Supplement: NIHMS556455-supplement-01.pdf [file NIHMS556455-supplement-01.pdf]

# **Resilience of Precuneus Neurotrophic Signaling Pathways Despite Amyloid Pathology in Prodromal Alzheimer's Disease**

## **Supplement 1**

### ***Supplemental Subject Data and Methods***

#### **Clinical and Neuropathological Evaluations**

Memory tests consisted of the East Boston Memory immediate and delayed recall, Logical Memory immediate and delayed story recall, Consortium to Establish a Registry for Alzheimer's Disease (CERAD) Word List Memory immediate and delayed recall, and CERAD Word List Recognition were computed. At consensus conferences, neurologists and neuropsychologists reviewed clinical and medical records and family interviews before assigning a final clinical diagnosis. Neuropathological evaluation was applied as we reported previously (1, 2, 3, 4). Parkinson's disease and dementia with Lewy body cases were excluded. No cases were treated with anticholinesterase inhibitors.

#### **Tissue**

For [<sup>3</sup>H]PiB binding, samples were added to a homogenization buffer (250 mM sucrose, 20 mM Tris base) containing protease inhibitors (Sigma 100X). Another aliquot was for Ab ELISA (see main text) and another was diluted to 10 mg tissue/mL with potassium PBS (pH 7.4) for western blotting.

#### **Antibodies**

All antibodies used in western blot are commercially available and their specificity has been characterized (5, 6, 7) (see Table S1). The antibodies include: proNGF polyclonal

antiserum (1:50, H-20, Santa Cruz, CA); purified TrkA rabbit polyclonal affinity-purified (1:100, Fitzgerald, Acton, MA); sortilin (1:1000) and p75<sup>NTR</sup> rabbit polyclonal antibody (1:500) obtained from Abcam (Cambridge, MA); p44/p42 MAPK rabbit antibody (Erk1/2) (1:1000), phospho-p44/p42 MAPK (Erk1/2) (Thr202/Tyr204) (E10) mouse antibody (1:2000), SAPK/JNK (56G8) rabbit antibody (1:1000), and phospho-SAPK/JNK (Thr183/Tyr185) (81E11) rabbit antibody (1:2000) (Cell Signaling Technology, Danvers, MA). Loading control was  $\beta$ -tubulin monoclonal antibody (1:4000) (Millipore, Bedford, MA). The following IgG monoclonal antibodies were used for histology: APP/Ab (6E10; 1:1000, Covance, Princeton, NJ), tau AT8 (pSer202/Thr295) (1:1000, ThermoFisher, Pittsburgh, PA), tau TOC-1 (8, 9) (oligomeric tau) (1:400) and Tau C3 (10) (truncated tau at aspartic acid 421) (1:4000) (gifts from L. Binder, Northwestern University Medical Center, Chicago, IL).

### **Quantitative Immunoblotting**

Membranes were blocked in Tris-buffered saline (TBS)/0.05% Tween-20/5% milk for 60 minutes (20°C) with the exception of proNGF, which was blocked in 0.5X TBS/0.5% milk for 20 min, and phospho-JNK and phospho-Erk, which were blocked in TBS/0.05% Tween-20/3% BSA for 60 minutes. After 60-minute primary antibody incubation, membranes were incubated overnight (4°C). After washes (TBS/0.05% Tween-20), membranes were incubated for 1 hour (20°C) with horseradish peroxidase-conjugate goat anti-mouse IgG secondary antibody (1:4000, Pierce, Rockford, IL), horseradish peroxidase-conjugated goat-anti rabbit IgG secondary antibody (1:4000, Bio-Rad, Hercules, CA), goat anti-rabbit IRDye 800CW secondary antibody (1:8000, LI-COR, Lincoln, NE) or goat anti-mouse IRDye 800 CW secondary antibody (1:8000, LI-COR) depending on the first antibody (Table S1). Immunoreactivity was visualized by

enhanced chemiluminescence (Pierce) on a Kodak Image Station 440CF (Perkin-Elmer, Wellesley, MA) or by an Odyssey Infrared Imager (LI-COR). Bands were quantified using Kodak 1D or Odyssey Infrared Imager software. Protein signals were normalized to  $\beta$ -tubulin and samples analyzed in three independent experiments.

### **Histofluorescence and Immunohistochemistry**

Sections were washed in TBS to remove cryoprotectant and incubated in 0.1 M sodium metaperiodate (Sigma, St. Louis, MO) in TBS to inactivate endogenous peroxidase activity. Tissue was permeabilized in TBS containing 0.25% Triton-X (ThermoFisher, Waltham, MA) and blocked in TBS containing 3% goat serum for 1 hr. Sections were incubated with appropriate antibody dilutions overnight (20°C) in 0.25% Triton X-100, 1% goat serum solution, then washed in TBS containing 1% goat serum prior to incubation with the secondary antibody biotinylated goat anti-mouse (1:200 dilution for 1 hr) (Vector Laboratories, Burlingame, CA). Following TBS washes, sections were incubated using the Vectastain ABC kit (Vector Laboratories) for 1 hr, rinsed (0.2 M sodium acetate, 1.0 M imidazole buffer, pH 7.4) and developed in acetate-imidazole buffer (0.05% 3,3'-diaminobenzidine tetrahydrochloride, DAB, Sigma) with or without 1% nickel sulfate. Reaction was terminated in acetate-imidazole buffer, tissue mounted on glass slides, dehydrated through graded alcohols, cleared in xylene and cover slipped using DPX (Biochemica Fluka, Switzerland). TOC-1 antibody staining was performed on sections mounted on charged slides that were boiled in 0.01 M citric acid (pH 8.5) for 20 min for antigen-retrieval.

### **Plaque Load Quantification**

Three randomly selected microscopic fields in three sections (nine images total per marker per case); positive signal was segregated from background by applying a color threshold (pixel intensity cutoff) that was kept constant for each marker. Image quantification was performed using Image J freeware (NIH, Bethesda, Maryland). Morphological characteristics differentiated diffuse and compact/cored plaques. X-34 positive dystrophic neurites confirmed that all compact/cored plaques were neuritic.

### **Statistical Analysis**

Analyses were performed using Sigma Stat 3.5 (Systat Software, Inc., San Jose, CA) or SAS 9.2 (SAS Institute Inc., Cary, NC) and graphed using box and scatter plots (Sigma Plot 10.0; Systat Software, Inc.).

**Table S1. Summary of antibodies**

|                             | <b>Antibodies</b>                                         | <b>Epitope or Immunogen</b>                         | <b>Dilution</b> | <b>Company and Catalog #</b>                        |
|-----------------------------|-----------------------------------------------------------|-----------------------------------------------------|-----------------|-----------------------------------------------------|
| ProNGF                      | rabbit polyclonal to NGF (H-20)                           | N-terminus of NGF                                   | 1:50            | Santa Cruz Biotechnology;<br># sc-548               |
| TrkA receptor               | rabbit polyclonal to TrkA                                 | External domain of TrkA                             | 1:100           | Fitzgerald Industries<br>International; # 20R-TR013 |
| p75 <sup>NTR</sup> receptor | rabbit polyclonal to p75 NGF receptor                     | aa' 250-350 of p75 <sup>NTR</sup>                   | 1:500           | Abcam; # ab38335                                    |
| Sortilin                    | rabbit polyclonal to Sortilin                             | C-terminus of sortilin                              | 1:1000          | Abcam; # ab16640                                    |
| JNK                         | rabbit polyclonal to SAPK/JNK (56G8)                      | Human JUNK2/MBP                                     | 1:1000          | Cell Signaling Technology;<br># 9258                |
| Phospho-JNK                 | rabbit polyclonal to phospho SAPK/JNK<br>(81E11)          | phospho-Thr 183, phospho-Tyr<br>185                 | 1:2000          | Cell Signaling Technology;<br># 4668                |
| Erk                         | rabbit polyclonal to p44/42 MAPK (Erk1/2)                 | Erk1 (p44), Erk2 (p42)                              | 1:1000          | Cell Signaling Technology;<br># 9102                |
| Phospho-Erk                 | mouse monoclonal to phospho p44/42<br>MAPK (Erk1/2) (E10) | phospho-Thr202, phospho-Tyr<br>204                  | 1:2000          | Cell Signaling Technology;<br># 9106                |
| $\beta$ -tubulin            | mouse monoclonal to tubulin (KMX-1)                       | tubulin from polycephalum<br>myxamoebae             | 1:4000          | Millipore; # MAB3408                                |
| APP/A $\beta$ (6E10)        | mouse monoclonal to human A $\beta$                       | residues1-16 of A $\beta$                           | 1:2000          | Covance; # SIG-39320                                |
| Tau (AT8)                   | mouse monoclonal to phosphorylated tau                    | phosphor-Ser202, phospho-Thr<br>205                 | 1:1000          | ThermoFisher; # MN1020                              |
| Tau TOC-1                   | mouse monoclonal to oligomeric tau                        | cross-linked tau dimers                             | 1:400           | Gift from L. Binder                                 |
| Tau C3                      | mouse monoclonal to truncated tau                         | C-terminus of tau truncated at<br>aspartic acid 421 | 1:4000          | Gift from L. Binder                                 |

**Table S2. Summary of precuneus soluble A $\beta_{1-42}$  and [ $^3\text{H}$ ]PiB levels in RROS cases, by clinical diagnosis category**

|                          | <b>NCI</b><br><b>(n = 14)</b>               | <b>MCI</b><br><b>(n = 14)*</b>  | <b>AD</b><br><b>(n = 14)</b>    | <b>p-value<sup>a</sup></b> | <b>Pair-wise comparison</b> |
|--------------------------|---------------------------------------------|---------------------------------|---------------------------------|----------------------------|-----------------------------|
| Soluble A $\beta_{1-42}$ | 5.5 $\pm$ 6.9<br>(0.06 - 21.6) <sup>b</sup> | 5.6 $\pm$ 5.3<br>(0.06 - 18.1)  | 13.7 $\pm$ 7.0<br>(0.68 - 27.6) | 0.004                      | (NCI, MCI) < AD             |
| [ $^3\text{H}$ ]PiB      | 126.8 $\pm$ 92.0<br>(37 - 325)              | 165.8 $\pm$ 138.7<br>(28 - 423) | 305.6 $\pm$ 148.7<br>(83 - 662) | 0.003                      | (NCI, MCI) < AD             |

AD, Alzheimer's disease; MCI, mild cognitively impaired; NCI, no cognitive impairment; RROS, Rush Religious Order Study.

\*Amyloid data not available for one MCI case.

<sup>a</sup>Kruskal-Wallis test, with Dunn's correction for multiple comparisons.

<sup>b</sup>Mean  $\pm$  standard deviation (range).

**Table S3. Summary APP/A $\beta$ , 6-CN-PiB and X-34 plaque density/load by clinical diagnosis**

|                                        | <b>NCI<br/>(n = 6)</b>        | <b>MCI<br/>(n = 6)</b> | <b>AD<br/>(n = 6)</b> | <b>p-value<sup>a</sup></b> | <b>Pair-wise<br/>comparison</b> |
|----------------------------------------|-------------------------------|------------------------|-----------------------|----------------------------|---------------------------------|
| APP/A $\beta$ plaque density<br>(6E10) | 0.74<br>(0-5.39) <sup>b</sup> | 4.80<br>(0.69-6.11)    | 4.67<br>(4.21-5.57)   | 0.071                      | --                              |
| Diffuse 6-CN-PiB                       | 0<br>(0-0.86)                 | 0.22<br>(0-2.67)       | 0.38<br>(0.12-0.90)   | 0.059                      | --                              |
| Compact 6-CN-PiB                       | 0<br>(0-0.67)                 | 0.77<br>(0-1.23)       | 0.92<br>(0.43-1.58)   | 0.030                      | NCI < AD                        |
| Total 6-CN-PiB load                    | 0<br>(0-1.20)                 | 1.05<br>(0-2.68)       | 1.06<br>(0.54-1.84)   | 0.060                      | --                              |
| Diffuse X-34                           | 0<br>(0-1.39)                 | 0.67<br>(0-2.50)       | 0.53<br>(0.08-1.04)   | 0.099                      | --                              |
| Neuritic X-34                          | 0<br>(0-1.78)                 | 0.73<br>(0-1.68)       | 1.06<br>(0.61-1.18)   | 0.10                       | --                              |
| Total X-34 load                        | 0<br>(0-2.19)                 | 1.13<br>(0-2.51)       | 1.27<br>(0.66-1.62)   | 0.11                       | --                              |

AD, Alzheimer's disease; MCI, mild cognitively impaired; NCI, no cognitive impairment.

<sup>a</sup>Kruskal-Wallis test, with Dunn's correction for multiple comparisons.

<sup>b</sup>Median (range) of log-transformed plaque density (number/mm<sup>2</sup>) or load values.

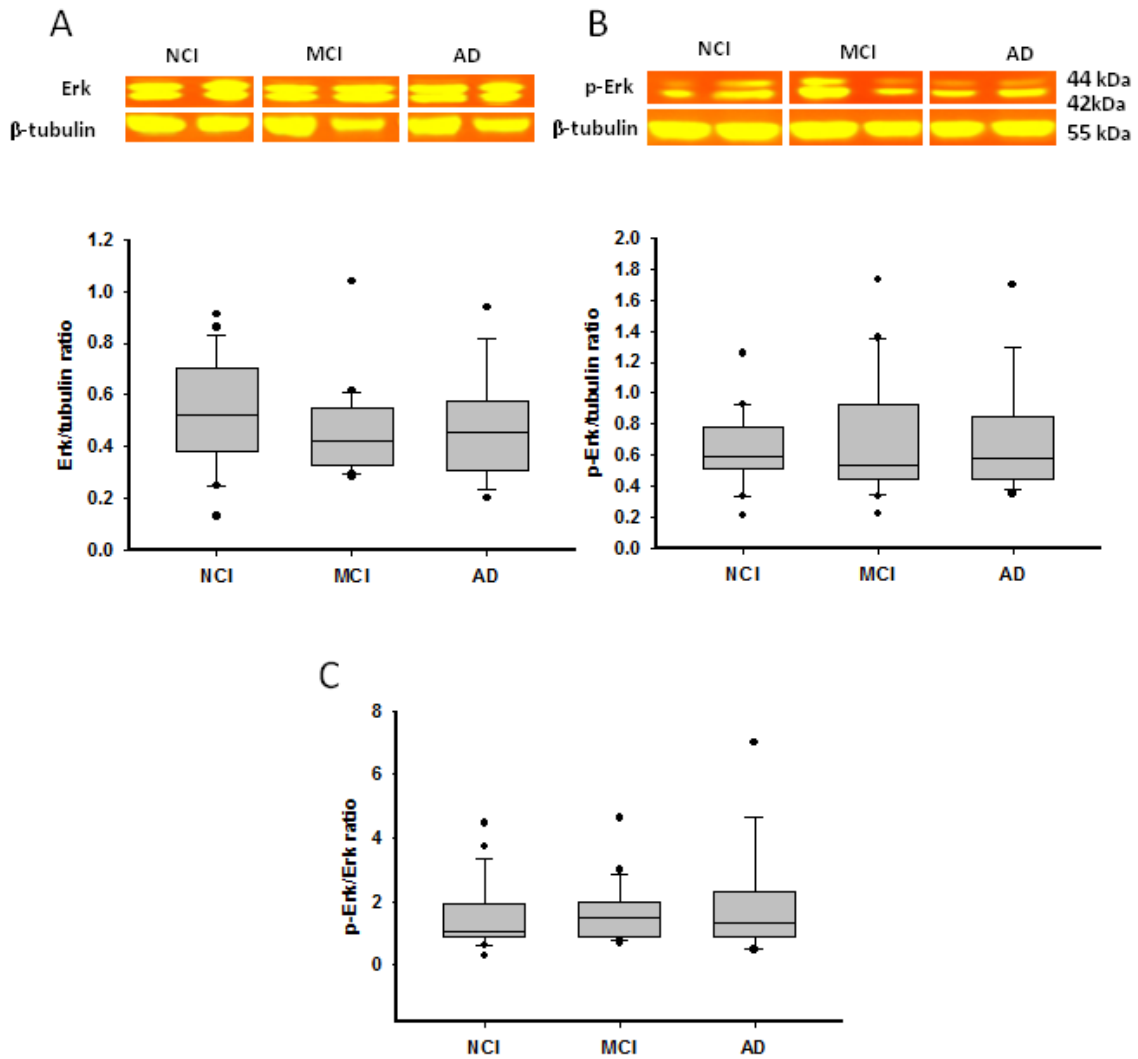

**Figure S1.** Representative immunoblots and box plots of precuneus levels of total Erk, phospho-Erk (p-Erk) in cases clinically diagnosed as NCI, MCI and AD. Box-plot of the phospho-Erk/Erk ratio is also presented.  $\beta$ -tubulin probe was used to normalize the immunoreactive signals obtained by densitometry in the blots. Levels of Erk (A), phospho-Erk (B) and phospho-Erk/Erk ratio (C) revealed no statistical differences across the clinical groups. Black dots in box-plots indicate outliers. AD, Alzheimer’s disease; MCI, mild cognitively impaired; NCI, no cognitive impairment.



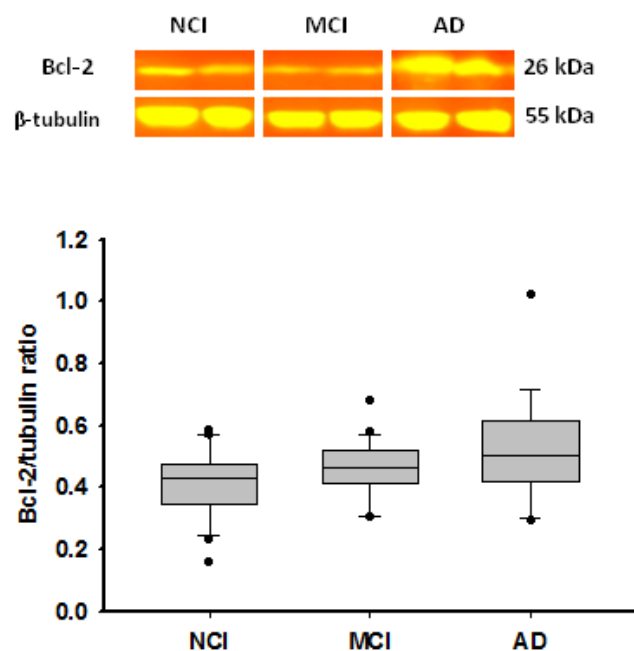

**Figure S2.** Representative immunoblot and box plot of precuneus levels of Bcl-2 in NCI, MCI and AD cases.  $\beta$ -tubulin probe was used to normalize the immunoreactive signals obtained by densitometry. Levels of Bcl-2 were significantly higher in AD compared to NCI ( $*p = 0.043$ ). Black dots in box-plots indicate outliers. AD, Alzheimer's disease; MCI, mild cognitively impaired; NCI, no cognitive impairment.

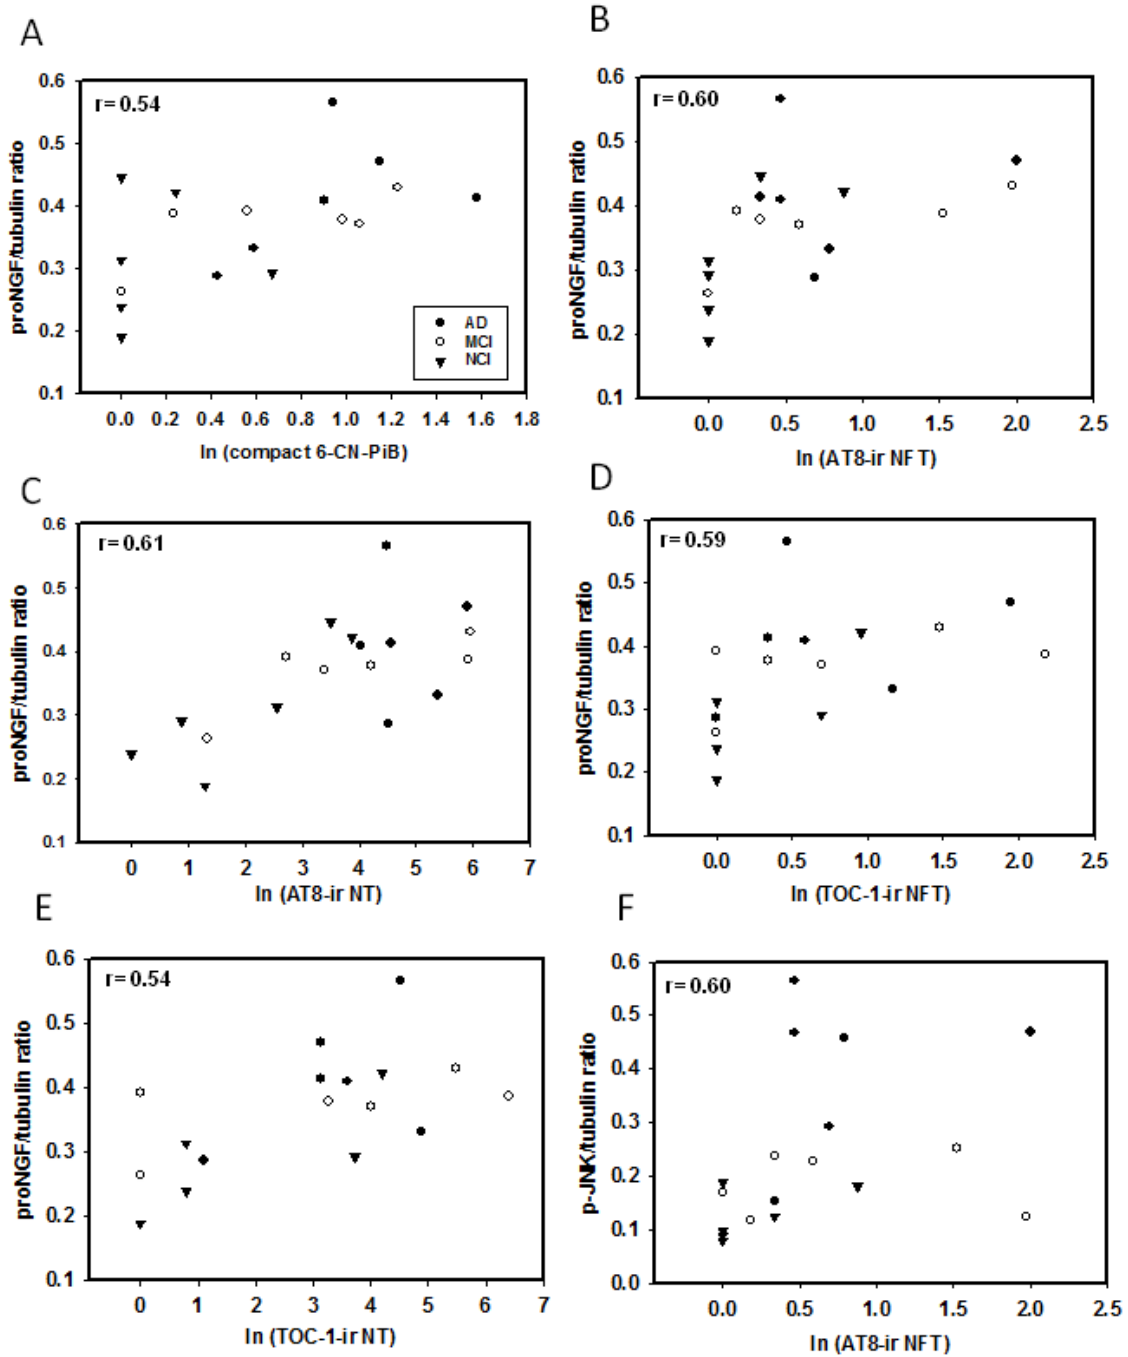

**Figure S3.** Precuneus proNGF levels correlated positively of compact (neuritic) 6-CN-PiB load (A) as well as AT8 positive NFT (B) and NT (C) and TOC-1 positive NFT (D) and NT (E) density using natural logarithm transformation ( $\ln$ ) of the data. Phospho-JNK correlated positively with the  $\ln$  transformed data of AT8 positive NFT (F) density. NCI, filled triangles; MCI, open circles; AD, filled circles. AD, Alzheimer’s disease; MCI, mild cognitively impaired; NCI, no cognitive impairment; NFT, neurofibrillary tangle; NT, neuropil thread.

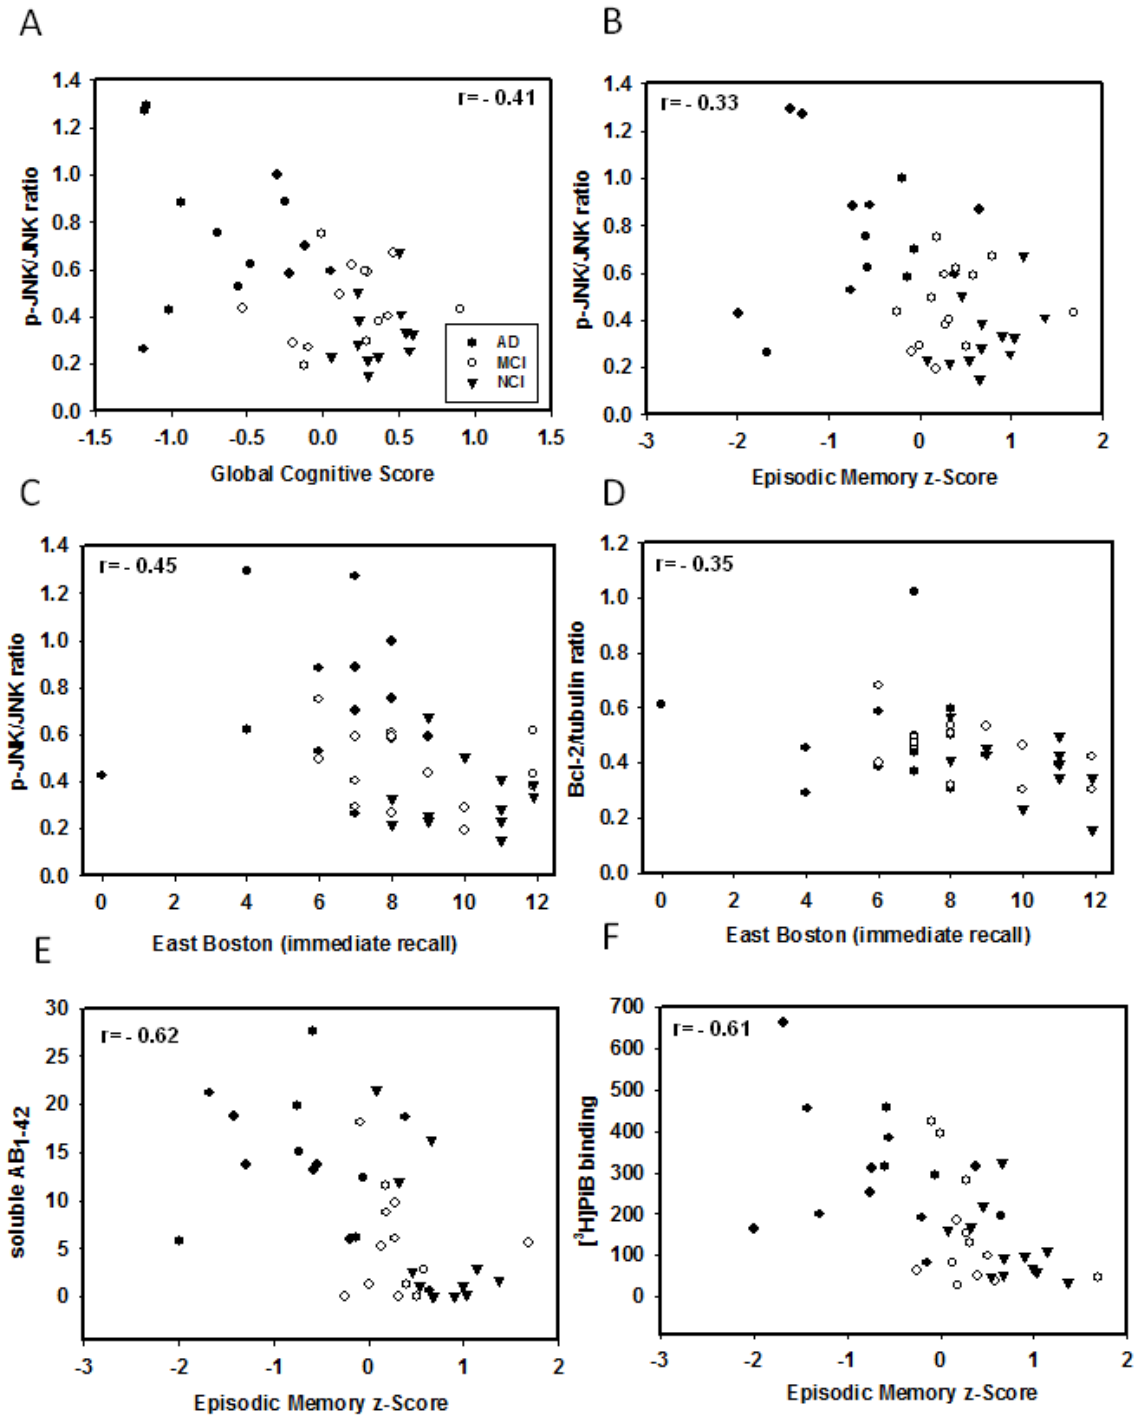

**Figure S4.** Precuneus phospho-JNK/JNK (p-JNK/JNK) ratio levels correlated negatively with several of the cognitive tests: global cognitive score (A), episodic memory z-score (B) and East Boston memory immediate recall (C), while Bcl-2 levels only correlated with East Boston memory immediate recall (D). Precuneus soluble Ab<sub>1-42</sub> (E) and [<sup>3</sup>H]PiB binding (F) levels correlated also negatively with episodic memory z-score. NCI, filled triangles; MCI, open circles; AD, filled circles. AD, Alzheimer's disease; MCI, mild cognitively impaired; NCI, no cognitive impairment.

## Supplemental References

1. Bennett DA, Schneider JA, Bienias JL, Evans DA, Wilson RS (2005): Mild cognitive impairment is related to Alzheimer disease pathology and cerebral infarctions. *Neurology* 64: 834-841.
2. Mufson EJ, Chen EY, Cochran EJ, Beckett LA, Bennett DA, Kordower JH (1999): Entorhinal cortex beta-amyloid load in individuals with mild cognitive impairment. *Exp Neurol* 158: 469-490.
3. Schmitt FA, Nelson PT, Abner E, Scheff S, Jicha GA, Smith C, *et al.* (2012): University of Kentucky Sanders-Brown healthy brain aging volunteers: donor characteristics, procedures and neuropathology. *Curr Alzheimer Res* 9: 724-733.
4. Perez SE, Getova DP, He B, Counts SE, Geula C, Desire L, *et al.* (2012): Rac1b increases with progressive tau pathology within cholinergic nucleus basalis neurons in Alzheimer's disease. *Am J Pathol* 180: 526-540.
5. Peng S, Wu J, Mufson EJ, Fahnestock M (2004): Increased proNGF levels in subjects with mild cognitive impairment and mild Alzheimer disease. *J Neuropathol Exp Neurol* 63: 641-649.
6. Mufson EJ, He B, Nadeem M, Perez SE, Counts SE, Leurgans S, *et al.* (2012): Hippocampal proNGF signaling pathways and  $\beta$ -amyloid levels in mild cognitive impairment and Alzheimer disease. *J Neuropathol Exp Neurol* 71: 1018-1029.
7. Counts SE, Nadeem M, Wu J, Ginsberg SD, Saragovi HU, Mufson EJ (2004): Reduction of cortical TrkA but not p75(NTR) protein in early-stage Alzheimer's disease. *Ann Neurol* 56: 520-531.
8. Patterson KR, Remmers C, Fu Y, Brooker S, Kanaan NM, Vana L, *et al.* (2011): Characterization of prefibrillar Tau oligomers in vitro and in Alzheimer disease. *J Biol Chem* 286: 23063-23076.
9. Ward SM, Himmelstein DS, Lancia JK, Binder LI (2012): Tau oligomers and tau toxicity in neurodegenerative disease. *Biochem Soc Trans* 40: 667-671.
10. Guillozet-Bongaarts AL, Garcia-Sierra F, Reynolds MR, Horowitz PM, Fu Y, Wang T, *et al.* (2005): Tau truncation during neurofibrillary tangle evolution in Alzheimer's disease. *Neurobiol Aging* 26: 1015-1022.
